# Supplementary material for: Antigen Presenting Properties of a Myeloid Dendritic-Like Cell in Murine Spleen
Source: PubMed Central journal article supplement (PMC5031434; doi:10.1371/journal.pone.0162358), 2016-09-21
Supplement: pone.0162358.s001.pdf [file pone.0162358.s001.pdf]

**S1 Fig. Genes specifically expressed between L-DC and CD8<sup>+</sup> cDC.**

| Gene Symbol          | Fold-Change<br>(L-DC vs.<br>CD8 <sup>+</sup> cDC) <sup>+</sup> | L-DC    |                   | CD8 <sup>+</sup> cDC |                   |
|----------------------|----------------------------------------------------------------|---------|-------------------|----------------------|-------------------|
|                      |                                                                | Mean*   | Standard<br>Error | Mean*                | Standard<br>Error |
| <i>Zeb2</i>          | 14.837                                                         | 548.052 | 67.119            | 36.668               | 0.693             |
| <i>Ifitm6</i>        | 14.407                                                         | 646.978 | 112.504           | 44.228               | 0.583             |
| <i>Gm9733</i>        | 14.262                                                         | 508.325 | 16.090            | 35.626               | 0.282             |
| <i>Gzmb</i>          | 13.854                                                         | 451.871 | 24.728            | 33.097               | 5.901             |
| <i>Ms4a4a</i>        | 13.817                                                         | 511.336 | 80.421            | 36.838               | 4.618             |
| <i>Atp1a3</i>        | 13.665                                                         | 528.196 | 5.192             | 38.733               | 2.487             |
| <i>Llcam</i>         | 13.556                                                         | 448.746 | 22.570            | 33.109               | 1.794             |
| <i>Gda</i>           | 12.573                                                         | 385.173 | 7.133             | 30.667               | 1.525             |
| <i>Sqrdl</i>         | 12.326                                                         | 328.967 | 23.265            | 27.184               | 5.500             |
| <i>Pltp</i>          | 12.081                                                         | 485.865 | 58.788            | 39.922               | 0.244             |
| <i>Lrp1</i>          | 11.975                                                         | 375.113 | 16.648            | 31.303               | 0.711             |
| <i>Lilra5</i>        | 11.826                                                         | 442.285 | 10.181            | 37.485               | 2.662             |
| <i>Ncr1</i>          | 11.540                                                         | 393.951 | 22.797            | 34.091               | 0.864             |
| <i>C3</i>            | 11.306                                                         | 425.896 | 13.786            | 37.653               | 0.302             |
| <i>Pla2g7</i>        | 11.213                                                         | 510.647 | 32.392            | 45.452               | 0.237             |
| <i>Tlr8</i>          | 11.029                                                         | 361.373 | 32.602            | 32.676               | 1.666             |
| <i>Abcd2</i>         | 10.848                                                         | 260.523 | 7.352             | 24.036               | 1.217             |
| <i>Nupr1</i>         | 10.478                                                         | 481.366 | 36.486            | 45.904               | 2.918             |
| <i>Hgf</i>           | 10.139                                                         | 278.901 | 5.863             | 27.518               | 0.972             |
| <i>Ikzf3</i>         | 9.856                                                          | 290.713 | 35.031            | 29.362               | 2.181             |
| <i>Fam46a</i>        | 9.784                                                          | 378.418 | 16.911            | 38.660               | 1.309             |
| <i>Krt80</i>         | 9.635                                                          | 423.455 | 0.465             | 43.950               | 0.235             |
| <i>Sepp1</i>         | 9.454                                                          | 326.572 | 47.610            | 34.184               | 0.839             |
| <i>Gm5150</i>        | 9.449                                                          | 367.228 | 82.481            | 37.895               | 1.292             |
| <i>A630033H20Rik</i> | 9.332                                                          | 320.050 | 30.498            | 34.168               | 1.417             |
| <i>Irak3</i>         | 9.060                                                          | 264.136 | 8.938             | 29.259               | 2.663             |
| <i>Pparg</i>         | 8.974                                                          | 421.427 | 17.184            | 46.938               | 1.276             |
| <i>Abca9</i>         | 8.492                                                          | 234.244 | 11.094            | 27.566               | 0.790             |
| <i>Klra8</i>         | 8.341                                                          | 236.170 | 3.963             | 28.324               | 0.895             |
| <i>Fcgr3</i>         | 8.200                                                          | 300.711 | 28.094            | 36.512               | 0.215             |
| <i>Zfyve9</i>        | 8.196                                                          | 308.588 | 0.476             | 37.663               | 0.892             |
| <i>Fam55d</i>        | 8.157                                                          | 251.301 | 1.203             | 30.864               | 1.892             |
| <i>Arhgef3</i>       | 7.919                                                          | 387.354 | 66.081            | 48.211               | 1.141             |
| <i>Mgst1</i>         | 7.917                                                          | 166.937 | 11.405            | 21.039               | 0.326             |
| <i>Slpr5</i>         | 7.904                                                          | 303.395 | 4.288             | 38.477               | 2.729             |
| <i>Plxnb2</i>        | 7.784                                                          | 287.536 | 21.735            | 36.948               | 2.883             |
| <i>Mdm1</i>          | 7.713                                                          | 260.629 | 0.366             | 33.795               | 0.634             |
| <i>Ccl9</i>          | 7.643                                                          | 328.078 | 28.768            | 42.763               | 0.557             |
| <i>Gimap4</i>        | 7.342                                                          | 289.814 | 26.903            | 39.306               | 0.373             |
| <i>Svil</i>          | 7.290                                                          | 256.716 | 10.133            | 35.245               | 2.054             |
| <i>Trem3</i>         | 7.262                                                          | 357.258 | 13.473            | 49.163               | 0.101             |
| <i>Cd300lb</i>       | 7.242                                                          | 218.947 | 2.567             | 30.237               | 0.582             |
| <i>Ccdc125</i>       | 6.898                                                          | 197.052 | 2.197             | 28.629               | 1.895             |
| <i>Trem1</i>         | 6.609                                                          | 211.974 | 11.743            | 32.028               | 0.462             |
| <i>Gstm1</i>         | 6.574                                                          | 212.010 | 26.095            | 32.115               | 2.644             |
| <i>Rhoq</i>          | 6.467                                                          | 256.344 | 4.777             | 39.630               | 0.193             |
| <i>Tmem26</i>        | 6.400                                                          | 244.988 | 24.831            | 38.142               | 2.108             |
| <i>Xylt1</i>         | 6.398                                                          | 273.414 | 24.012            | 42.585               | 1.186             |
| <i>Rtp4</i>          | 6.380                                                          | 197.046 | 9.031             | 30.881               | 1.326             |
| <i>Pros1</i>         | 6.351                                                          | 179.988 | 24.135            | 28.108               | 1.130             |
| <i>Apoc2</i>         | 6.340                                                          | 240.037 | 11.321            | 37.820               | 0.295             |
| <i>Hp</i>            | 6.313                                                          | 182.405 | 43.577            | 28.123               | 1.913             |

|                      |         |         |        |         |        |
|----------------------|---------|---------|--------|---------|--------|
| <i>Tmem71</i>        | 6.311   | 151.394 | 20.686 | 23.769  | 0.444  |
| <i>Fpr1</i>          | 6.308   | 169.278 | 2.425  | 26.835  | 0.312  |
| <i>Thbd</i>          | 6.226   | 211.722 | 25.817 | 33.902  | 3.149  |
| <i>S100a6</i>        | 6.167   | 219.687 | 25.302 | 35.415  | 1.409  |
| <i>Cd84</i>          | 6.158   | 228.672 | 10.700 | 37.366  | 4.491  |
| <i>Rbpms</i>         | 6.026   | 288.010 | 12.871 | 48.001  | 4.910  |
| <i>Tbc1d2b</i>       | 5.971   | 191.380 | 0.900  | 32.084  | 1.493  |
| <i>Csf3r</i>         | 5.969   | 163.212 | 1.153  | 27.365  | 1.077  |
| <i>Map3k15</i>       | 5.930   | 247.350 | 7.442  | 41.866  | 3.836  |
| <i>B4galt5</i>       | 5.804   | 270.397 | 21.621 | 46.762  | 5.476  |
| <i>Cyp4f18</i>       | 5.798   | 195.922 | 7.464  | 33.830  | 2.110  |
| <i>Abi3</i>          | 5.691   | 188.720 | 13.844 | 33.098  | 1.328  |
| <i>Gcnt2</i>         | 5.659   | 201.374 | 9.994  | 35.548  | 0.638  |
| <i>Ms4a6d</i>        | 5.547   | 158.618 | 7.103  | 28.609  | 1.567  |
| <i>Rap1gap2</i>      | 5.470   | 212.381 | 9.855  | 38.794  | 0.906  |
| <i>6430548M08Rik</i> | 5.397   | 215.089 | 13.036 | 39.859  | 2.514  |
| <i>Pdlim1</i>        | 5.343   | 244.698 | 2.334  | 45.881  | 2.751  |
| <i>Alox5</i>         | 5.338   | 176.833 | 3.283  | 33.130  | 0.641  |
| <i>Ttc39a</i>        | -5.281  | 41.159  | 1.918  | 217.696 | 15.663 |
| <i>Amical</i>        | -5.347  | 38.433  | 1.812  | 206.023 | 17.717 |
| <i>Trpm2</i>         | -5.403  | 44.730  | 0.361  | 244.203 | 35.127 |
| <i>Frmd4b</i>        | -5.486  | 43.374  | 2.417  | 237.666 | 6.732  |
| <i>Gca</i>           | -5.498  | 45.694  | 2.830  | 252.937 | 33.173 |
| <i>Fam149a</i>       | -5.810  | 27.369  | 1.392  | 159.397 | 13.597 |
| <i>Fnip2</i>         | -6.095  | 42.679  | 5.517  | 259.547 | 28.938 |
| <i>Actn1</i>         | -6.103  | 34.869  | 2.537  | 212.299 | 5.480  |
| <i>Met</i>           | -6.298  | 35.512  | 2.706  | 223.965 | 20.668 |
| <i>Cxcl16</i>        | -6.382  | 42.028  | 0.692  | 268.406 | 11.225 |
| <i>Ppef2</i>         | -6.640  | 32.921  | 0.067  | 218.863 | 10.681 |
| <i>Fndc7</i>         | -6.643  | 29.337  | 0.427  | 194.899 | 4.072  |
| <i>Nek6</i>          | -6.724  | 34.587  | 2.361  | 232.055 | 4.099  |
| <i>H2-Oa</i>         | -6.780  | 32.437  | 0.130  | 221.097 | 22.887 |
| <i>Cdon</i>          | -6.952  | 41.034  | 2.449  | 284.776 | 0.732  |
| <i>Rab30</i>         | -7.135  | 42.721  | 0.268  | 304.795 | 0.546  |
| <i>Clec1a</i>        | -7.266  | 29.651  | 0.328  | 215.436 | 2.336  |
| <i>Itgae</i>         | -7.569  | 29.068  | 0.032  | 221.400 | 24.737 |
| <i>Rnf144b</i>       | -7.821  | 33.829  | 4.037  | 264.515 | 31.007 |
| <i>Ecel</i>          | -7.880  | 47.285  | 0.344  | 374.364 | 36.515 |
| <i>Plekha5</i>       | -8.317  | 42.413  | 6.056  | 349.171 | 6.188  |
| <i>Fam40b</i>        | -8.470  | 30.717  | 1.708  | 262.130 | 35.061 |
| <i>Ciita</i>         | -8.991  | 43.440  | 2.971  | 391.061 | 33.038 |
| <i>Gatm</i>          | -9.527  | 32.792  | 2.301  | 311.982 | 14.869 |
| <i>Kmo</i>           | -10.016 | 47.450  | 3.216  | 474.173 | 1.057  |
| <i>Adam19</i>        | -10.264 | 40.698  | 1.667  | 418.164 | 25.395 |
| <i>Gcet2</i>         | -10.314 | 30.685  | 0.161  | 316.697 | 11.734 |
| <i>Pdia5</i>         | -10.391 | 34.510  | 2.207  | 360.117 | 40.376 |
| <i>Adam8</i>         | -10.538 | 45.131  | 0.709  | 476.002 | 21.794 |
| <i>Hepacam2</i>      | -11.851 | 23.649  | 1.339  | 280.052 | 11.621 |
| <i>Kit</i>           | -12.288 | 45.381  | 3.567  | 556.738 | 30.154 |
| <i>Cacna1e</i>       | -13.444 | 34.281  | 0.870  | 461.562 | 27.567 |
| <i>Ly75</i>          | -13.465 | 44.834  | 0.452  | 603.775 | 10.825 |
| <i>Tlr3</i>          | -14.975 | 30.232  | 1.223  | 452.356 | 2.728  |

<sup>+</sup> Genes were selected which showed between 5 to 15 fold change in signal value where one subset has signal value  $\leq 50$  and the comparison subset has a signal value  $\geq 150$ , in either L-DC or CD8<sup>+</sup> cDC assessed in pairwise comparison.

\* Data represent mean of duplicate samples (n=2).
