# Supplementary material for: Antigen Presenting Properties of a Myeloid Dendritic-Like Cell in Murine Spleen
Source: PubMed Central journal article supplement (PMC5031434; doi:10.1371/journal.pone.0162358), 2016-09-21
Supplement: pone.0162358.s002.pdf [file pone.0162358.s002.pdf]

**S2 Fig. Genes specifically expressed between L-DC and CD8<sup>+</sup> cDC.**

| Gene Symbol          | Fold-Change<br>(L-DC vs. CD8 <sup>+</sup><br>cDC) <sup>+</sup> | L-DC    |                   | CD8 <sup>+</sup> cDC |                   |
|----------------------|----------------------------------------------------------------|---------|-------------------|----------------------|-------------------|
|                      |                                                                | Mean*   | Standard<br>Error | Mean*                | Standard<br>Error |
| <i>Gm10673</i>       | 7.387                                                          | 272.591 | 56.193            | 36.702               | 7.355             |
| <i>Fcgr3</i>         | 7.119                                                          | 300.711 | 40.598            | 42.165               | 3.019             |
| <i>Irak3</i>         | 6.566                                                          | 264.136 | 22.644            | 40.625               | 5.823             |
| <i>Map3k15</i>       | 6.537                                                          | 247.350 | 9.595             | 37.823               | 0.491             |
| <i>Hp</i>            | 6.532                                                          | 182.405 | 36.805            | 27.146               | 1.271             |
| <i>Tmem26</i>        | 6.344                                                          | 244.988 | 38.620            | 38.677               | 4.480             |
| <i>Mdm1</i>          | 6.070                                                          | 260.629 | 15.696            | 43.076               | 3.419             |
| <i>Apoc2</i>         | 6.045                                                          | 240.037 | 10.652            | 39.798               | 3.288             |
| <i>Fpr1</i>          | 5.936                                                          | 169.278 | 11.785            | 28.583               | 2.002             |
| <i>Thbd</i>          | 5.904                                                          | 211.722 | 22.901            | 35.616               | 1.195             |
| <i>Xylt1</i>         | 5.803                                                          | 273.414 | 32.386            | 46.949               | 1.091             |
| <i>Cd300lb</i>       | 5.783                                                          | 218.947 | 26.248            | 38.000               | 3.319             |
| <i>Svil</i>          | 5.765                                                          | 256.716 | 16.560            | 44.520               | 1.425             |
| <i>Trem1</i>         | 5.757                                                          | 211.974 | 20.345            | 36.820               | 2.085             |
| <i>Pros1</i>         | 5.710                                                          | 179.988 | 20.266            | 31.242               | 0.695             |
| <i>Ccde125</i>       | 5.227                                                          | 197.052 | 15.631            | 37.781               | 2.532             |
| <i>Gstm1</i>         | 5.092                                                          | 212.010 | 16.306            | 41.796               | 6.312             |
| <i>Lrrc16a</i>       | -5.055                                                         | 35.121  | 73.789            | 177.984              | 16.044            |
| <i>Ptpn3</i>         | -5.076                                                         | 30.921  | 2.082             | 157.520              | 13.583            |
| <i>Ptpn3</i>         | -5.165                                                         | 47.759  | 7.073             | 246.474              | 10.867            |
| <i>Dennd3</i>        | -5.320                                                         | 37.311  | 4.596             | 199.139              | 16.767            |
| <i>Ctnnd2</i>        | -5.372                                                         | 33.902  | 1.754             | 182.360              | 12.929            |
| <i>Flnb</i>          | -5.546                                                         | 48.463  | 6.019             | 270.441              | 29.982            |
| <i>Bub1</i>          | -5.601                                                         | 34.466  | 5.957             | 195.833              | 36.781            |
| <i>Card11</i>        | -5.850                                                         | 36.686  | 2.685             | 214.530              | 18.356            |
| <i>Tns1</i>          | -6.049                                                         | 32.084  | 2.670             | 194.485              | 12.789            |
| <i>Mical3</i>        | -6.091                                                         | 46.421  | 5.960             | 282.759              | 12.329            |
| <i>Clec9a</i>        | -6.333                                                         | 45.057  | 3.686             | 285.108              | 36.356            |
| <i>Gpm6b</i>         | -6.405                                                         | 34.712  | 5.485             | 223.304              | 21.383            |
| <i>Tbc1d4</i>        | -6.438                                                         | 42.156  | 3.074             | 272.840              | 28.020            |
| <i>Siglecg</i>       | -6.908                                                         | 49.420  | 4.720             | 338.777              | 11.596            |
| <i>St8sial1</i>      | -7.381                                                         | 29.334  | 8.984             | 217.773              | 23.448            |
| <i>B4galt6</i>       | -7.506                                                         | 44.314  | 6.252             | 333.803              | 32.710            |
| <i>Cdon</i>          | -7.539                                                         | 41.034  | 2.337             | 309.066              | 12.666            |
| <i>Ciita</i>         | -7.679                                                         | 43.440  | 2.430             | 332.968              | 10.191            |
| <i>Ptpn3</i>         | -7.950                                                         | 33.400  | 4.627             | 266.634              | 30.051            |
| <i>I300002K09Rik</i> | -7.991                                                         | 41.162  | 3.429             | 329.781              | 24.192            |

<sup>+</sup> Genes were selected which showed between 5 to 8 fold change in signal value where one subset has signal value  $\leq 50$  and the comparison subset has a signal value  $\geq 150$ , in either L-DC or CD8<sup>+</sup> cDC assessed in pairwise comparison.

\* Data represent mean of duplicate samples (n=2).
