# Supplementary material for: Antigen Presenting Properties of a Myeloid Dendritic-Like Cell in Murine Spleen
Source: PubMed Central journal article supplement (PMC5031434; doi:10.1371/journal.pone.0162358), 2016-09-21

### S3 Fig. Genes specifically expressed by CD8<sup>+</sup> cDC or CD8<sup>-</sup> cDC.

ANOVA analysis was used to make pairwise comparison of gene expression between the CD8<sup>+</sup> cDC and CD8<sup>-</sup> cDC subsets. Specifically expressed genes were selected using the criteria of signal value in one subset  $\leq 50$ , and signal value in the other  $\geq 150$ . This gave a dataset of 35 genes.

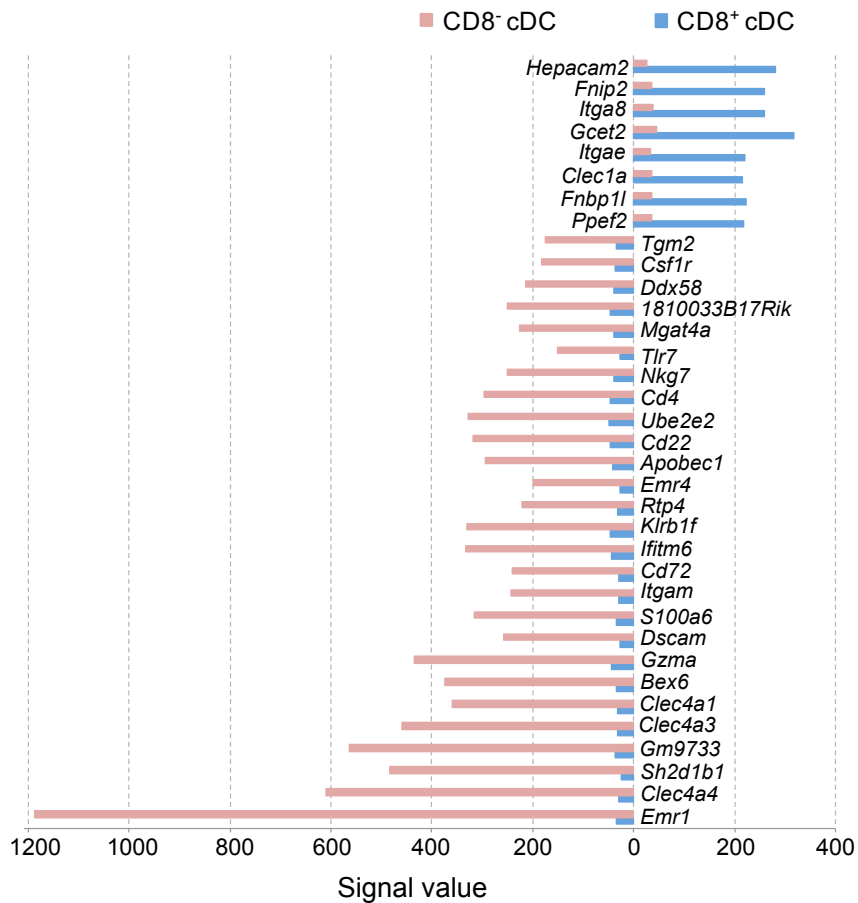

Supplement: pone.0162358.s003.pdf [file pone.0162358.s003.pdf]
